# Supplementary material
Source: Elsevier journal article supplement (https://www.sciencedirect.com/science/article/pii/S0213911122001042)
Supplement: mmc1 [file S0213911122001042:mmc1.doc]

**Appendix A**

**Figure I.** Boxplot of year-specific smoothed neighbourhood estimated prevalence of poor mental health applying effect size method.


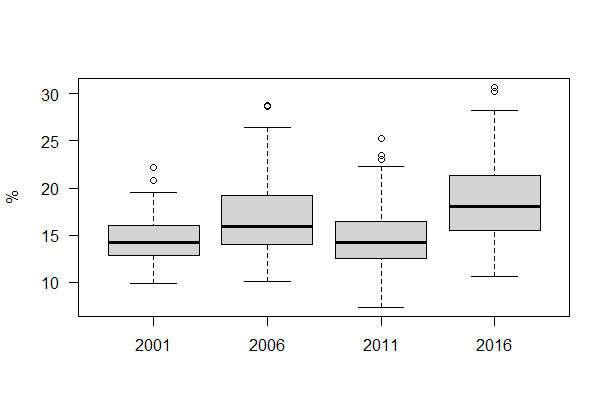


**Figure II.** Spatial smoothed estimates of poor mental health by neighbourhood and year.


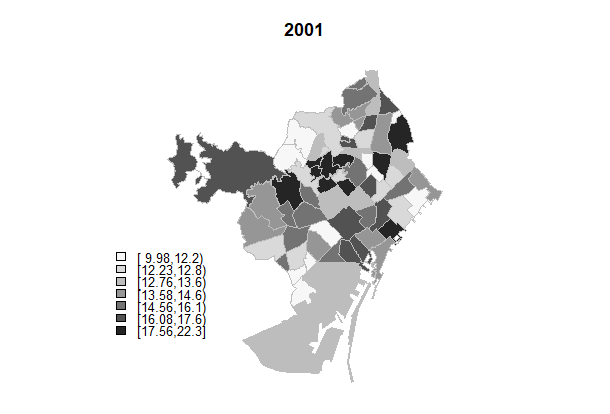

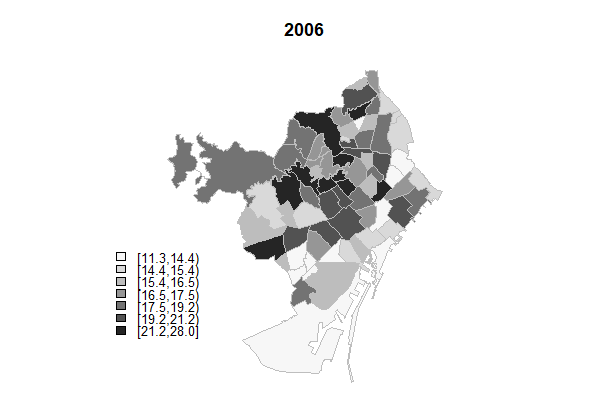


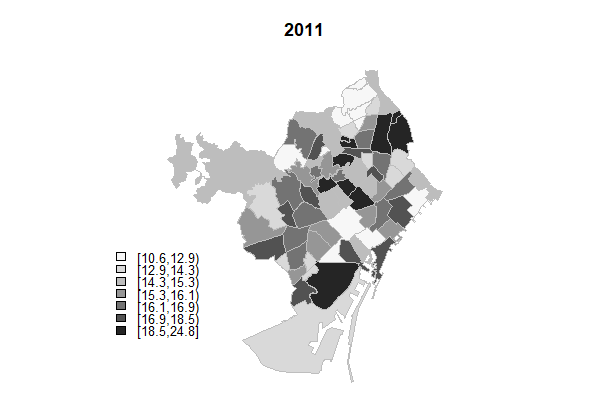

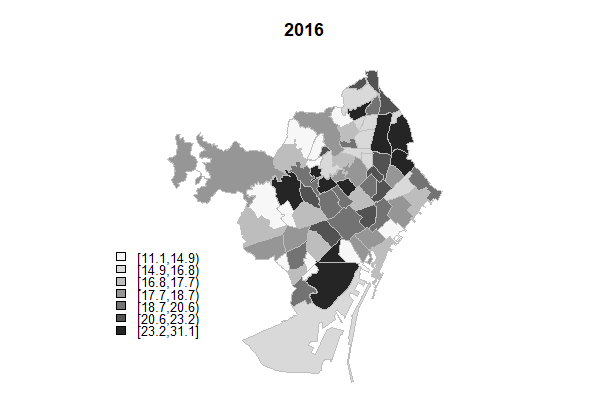


**Figure III.** Boxplot of spatial smoothed estimates of poor mental health by quartile of neighbourhood income and year.


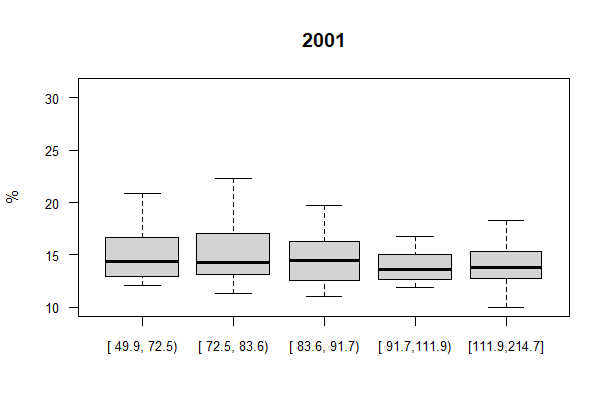

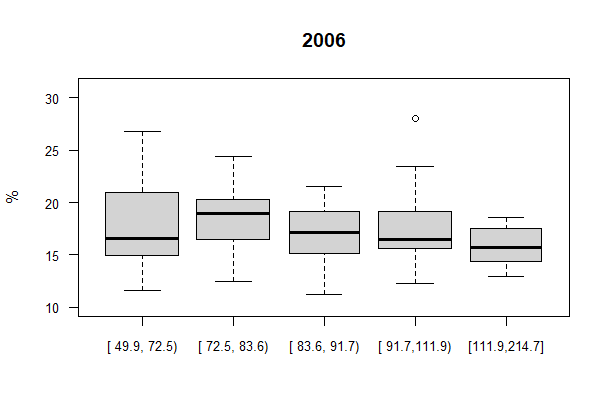

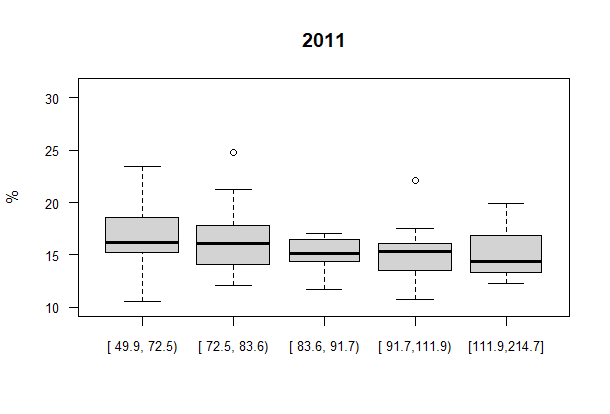

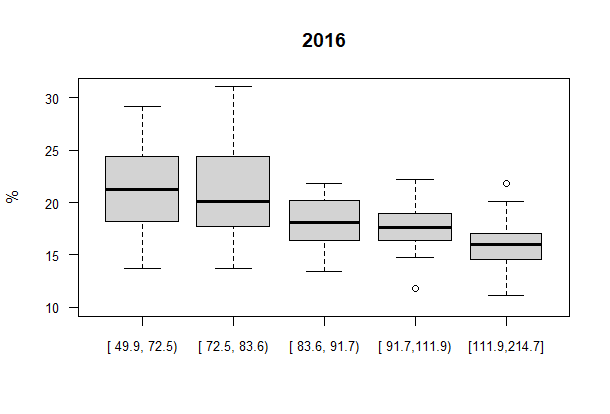


*Note:* Income quantile of less advantaged neighbourhoods IQ5 in the interval [49.9, 72.5] to more advantaged neighbourhoods IQ1 [119.2,214.7], with 100 being the index for the whole city for the year 2016.

**Appendix B**

**Detailed statistical model for smoothed estimates**

Let yik be the binary indicator of good and poor mental in the sample, taking values 0 and 1 respectively, for individual i in area k and nk the total number of cases in area k. If we have post-stratified weights wik, the prevalence estimates of poor mental health in area k that incorporates the sampling design is defined as Pk according to Σwik yik/nk. As stated in Mercer 201413, the asymptotic distribution of Pk is an estimator of the true population prevalence of area k, Popk, so that Pk|Popk is distributed as a Normal(Popk , var(Pk )), where var(Pk) is computed as var(Σ(wik yik))/n2k ), and the numerator as , being πik, πjk the inverse of the post-stratified weights for individuals i, j in area k. However, this distribution does not constrain the probability to lie in the interval (0,1), in particular in areas with small n. A convenient transformation is to define the area level summary as the logitstic transform of Pk: ylk=log(Pk/(1- Pk))=logit(Pk), so that, ylk|Popk is distributed according a Normal (logit(Pk), var(Pk)/P2k*(1- Pk)2). This estimator only takes into account the observations of the area of interest. To smooth the prevalences with information from the neighbourhood areas, the logit(Pk) can be modelled as the linear combination of the area-specific autoregressive spatial (uk) and the heterogeneous (vk) random effects (plus covariates of mean age XEk and composition of sex Xsk) as in the following expression:

(1)

An additional problem can occur in the case of sparse data by area when can take values of 0 or 1. In these cases, the solution proposed uses a beta-binomial model. The distribution is frequently used to capture overdispersion in binomially distributed data. The expected values for the prevalence of individual i in area k can be obtained as the posterior mean by the method of moments based on the beta-binomial model.20 In the few cases where the area variance is 0 we simply input the mean variance across the whole areas for that year.

**Sensibility analysis using BYM2**

**Table I**

Odds ratios and 95% credible intervals of poor mental health and by year and the pooled estimate

|  | **2001** | **2006** | **2011** | **2016** | **Pooled** |
| --- | --- | --- | --- | --- | --- |
| Age | 1.04 (0.99-1.09) | 1.01 (097-1.06) | 0.98 (0.94-1.03) | 1.00 (0.97-1.04) | 1.01 (0.99-1.03) |
| Men | Reference | reference | Reference | Reference | Reference |
| Women | 1.66 (0.56-4.91) | 2.18 (0.93-5.29) | 1.20 (0.42-3.47) | 1.16 (0.45-2.99) | 1.52 (1.00-2.31)* |
| Income |  |  |  |  |  |
| IQ 1 | Reference | Reference | Reference | Reference | Reference |
| IQ 2 | 1.04 (0.79-1.39) | 1.04 (0.65-1.65) | 0.86 (0.56-1.29) | 1.33 (0.92-1.91) | 1.00 (0.80-1.26) |
| IQ 3 | 1.17 (0.87-1.58) | 1.29 (0.79-2.09) | 0.96 (0.62-1.48) | 1.35 (0.91-2.01) | 1.14 (0.90-1.46) |
| IQ 4 | 1.31 (0.97-1.75) | 1.37 (0.85-2.20) | 1.07 (0.67-1.68) | 2.12 (1.47-3.03)a | 1.20 (0.95-1.52) |
| IQ 5 | 1.41 (1.04-1.91)a | 1.57 (1.00-2.49)a | 1.05 (0.64-1.68) | 2.29 (1.60-3.28)a | 1.32 (1.04-1.67)a |
| Time (t) |  |  |  |  | 1.01 (0.93-1.09) |
| IQ2*t |  |  |  |  | 1.06 (0.94-1.20) |
| IQ 3*t |  |  |  |  | 1.05 (0.92-1.18) |
| IQ 4*t |  |  |  |  | 1.15 (1.02-1.29)a |
| IQ 5*t |  |  |  |  | 1.14 (1.01-1.29)a |
| AIC | 93.8 | 163.2 | 153.2 | 135.7 | 575.7 |
| DIC | 94.4 | 163.3 | 154.5 | 133.5 | 555.9 |
| CPO | −3.77 | −3.35 | −3.35 | −3.56 | −5.03 |

AIC: Akaike information criteria CPO: conditional predictive ordinate; DIC: deviance information criterion; IQ: income quantile from the most advantaged IQ1 to the least advantaged IQ5.

aSignificant at p-value 0.05 or lower.

**Statistical code to generate Bayesian estimates**

Users should supply data file (“dades”) with age, sex, neighbourhood, mental health, weights (coded respectively as: edat0, sexe0, bar73, goldberg, PES_POSTF). Also load a file containing information on population size by neighbourhood (“bard”).

The following syntax is an example for computing smoothing Bayesian estimates adapted under request from Watjou et al.14

##declaring survey desing

designA <- svydesign(ids = ~1, weights = ~PES_POSTF, strata = ~dist , data = dades)

##adjusting variables by sex, age

Sexe<-svyby(~sexe0, ~bar73, designA, svymean)

Edat<-svyby(~edat0, ~bar73, designA, svymean)

ment.est=svyby(~goldberg,~bar73,svymean, design=designA, data=dades)

# check if some P_i = 0/1

which.area = ment.est[ment.est$goldberg %in% c(0,1),]$bar73

index.area = bard$bar73[bard$bar73 %in% which.area]

m.beta.bin = bard$samplesize[!is.na(bard$samplesize)]

y.beta.bin = as.vector(tapply(dades$goldberg, dades$bar73, sum))

fit.beta.bin = vglm(cbind(y.beta.bin, m.beta.bin-y.beta.bin) ~ 1, betabinomial, trace = TRUE)

if(class(fit.beta.bin)=="vglm"){

mu = Coef(fit.beta.bin)[1]; rho = Coef(fit.beta.bin)[2]

alpha = mu*(1-rho)/rho; beta = alpha*(1-mu)/mu

beta.prior.mean = alpha/(alpha + beta)

v_i = m.beta.bin / (m.beta.bin + alpha + beta)

beta.bin.mean = v_i*(y.beta.bin/m.beta.bin) + (1-v_i)*beta.prior.mean

ment.est$goldberg[ment.est$bar73 %in% which.area] = beta.bin.mean[index.area]

}

# calculate variance

var.est = NULL

for (i in 1:nrow(ment.est)){

bar73.index = ment.est$bar73[i]

set = dades[dades$bar73==bar73.index,]

set = set[complete.cases(set),]

t1 = (bard$popsize1[bard$bar73==bar73.index]-

bard$samplesize[bard$bar73==bar73.index])/

bard$popsize1[bard$bar73==bar73.index]

t2 = 1/(m.beta.bin[i]*(m.beta.bin[i]-1))

t3 = (unique(set$samplesize) - sum(set$goldberg))*(0 - ment.est$goldberg[i])^2 + sum(set$goldberg)*(1 - ment.est$goldberg[i])^2

var.est[i] = t1*t2*sum(t3)

}

#imputation of mean variances to neighbourhoods without variance depending on the year analized

var.est

var.est[42]<-NA

mean(var.est, na.rm=TRUE)

var.est[42]<-0.0425

#computing estimates

logit.p = log(ment.est$goldberg/(1-ment.est$goldberg))

logit.prec = 1/var.est*(ment.est$goldberg*(1-ment.est$goldberg))^2

data4 = data.frame(bar73=ment.est$bar73, logit.p=logit.p, logit.prec=logit.prec, Edat=Edat, Sexe=Sexe)

data5 = merge(bard, data4, by="bar73", all.x=TRUE)

data5$region.unstruct = data5$bar73

data5$region.struct = data5$bar73

#smoothed estimates (equation 1)

sdunif = "expression:

logdens=log(0.5)-log_precision/2;

return(logdens);"

formula = logit.p~ Edat + Sexe + f(region.unstruct,model="iid", hyper= list(prec = list(prior = sdunif))) + f(region.struct,model="besag", graph="E:/inla/Barri.graph", hyper=list(prec = list(prior = sdunif)), adjust.for.con.comp = FALSE)

mod <- inla(formula, family = "gaussian", data = data5,

control.fixed=list(prec.intercept=1),

control.predictor=list(compute=TRUE,link=1),

control.family=list(hyper=list(prec=list(initial=log(1),fixed=TRUE))),

scale=logit.prec ,control.compute=list(config = TRUE))

logit.p.est <- mod$summary.fitted.values[, "mean"]

p.est <- exp(logit.p.est)/(1 + exp(logit.p.est))

#computing neighbourhood by quatiles

renda <- read.dta("RENDA16.dta")

renda$RENDAQ<-cut2(renda$RENDA,g=5)

#levels(renda$RENDAQ)

renda$RENDAQ <- factor(renda$RENDAQ, levels=rev(levels(renda$RENDAQ)))

data5 = merge(renda, data5, by="bar73", all.x=TRUE) renda <- read.dta("RENDA16.dta")

renda$RENDAQ<-cut2(renda$RENDA,g=5)

renda$RENDAQ <- factor(renda$RENDAQ, levels=rev(levels(renda$RENDAQ)))

data5 = merge(renda, data5, by="bar73", all.x=TRUE)

#model for equation 2

sdunif = "expression:

logdens=log(0.5)-log_precision/2;

return(logdens);"

formula = logit.p~ Edat + Sexe + RENDAQ +f(region.unstruct,model="iid", hyper= list(prec = list(prior = sdunif))) +

f(region.struct,model="besag", graph="D:/inla/Barri.graph", hyper=list(prec = list(prior = sdunif)), adjust.for.con.comp = FALSE)

mod <- inla(formula, family = "gaussian", data = data5,

control.fixed=list(prec.intercept=1),

control.predictor=list(compute=TRUE,link=1),

control.family=list(hyper=list(prec=list(initial=log(1),fixed=TRUE))),

scale=logit.prec, control.compute=list(dic=TRUE,cpo=TRUE, waic=TRUE))

logit.p.est <- mod$summary.fitted.values[, "mean"]

logit.p.se <- mod$summary.fitted.values[, "sd"]

p.est <- exp(logit.p.est)/(1 + exp(logit.p.est))

p.se <- exp(logit.p.est)/(1 + exp(logit.p.est)) * (p.est * (1-p.est))

p.ll <- exp(mod$summary.fitted.values[, "0.025quant"])/(1 + exp(mod$summary.fitted.values[, "0.025quant"]))

p.ul <- exp(mod$summary.fitted.values[, "0.975quant"])/(1 + exp(mod$summary.fitted.values[, "0.975quant"]))

list(p.est, p.se, p.ll, p.ul, data5$bar73 )

#model for equation 3

Consider “data7R” be the data with staked yearly database

formula = logit.p~ Edt + Sexe + RENDAQ2*t+ f(region.unstruct,t, model="iid", hyper=list(prec = list(prior = sdunif))) +

f(region.struct,model="besag", graph="D:/inla/Barri.graph", hyper=list(prec = list(prior = sdunif)), adjust.for.con.comp = FALSE)

mod2R0116 <- inla(formula, family = "gaussian", data = data7R,

control.fixed=list(prec.intercept=1),

control.predictor=list(compute=TRUE,link=1),

control.family=list(hyper=list(prec=list(initial=log(1),fixed=TRUE))),

scale=logit.prec ,control.compute=list(dic=TRUE,cpo=TRUE, waic=TRUE))

#robustness analysis with bym2 equation2

prior <- list(

prec = list(

prior = "pc.prec",

param = c(0.5 / 0.31, 0.01)),

phi = list(

prior = "pc",

param = c(0.5, 2 / 3))

)

formula = logit.p~ Edat + Sexe + RENDAQ +

f(region.struct,model="bym2", graph="E:/inla/Barri.graph", hyper=prior , adjust.for.con.comp = TRUE)

mod <- inla(formula, family = "gaussian", data = data5,

control.fixed=list(prec.intercept=1),

control.predictor=list(compute=TRUE,link=1),

control.family=list(hyper=list(prec=list(initial=log(1),fixed=TRUE))),

scale=logit.prec , control.compute=list(dic=TRUE,cpo=TRUE, waic=TRUE))

#for the pooled analysis bym2 equation3

formula = logit.p~ Edt + Sexe + RENDAQ2*t+ f(region.unstruct,t, model="iid") +

f(region.struct,model="bym2", graph="E:/inla/Barri.graph", hyper=prior, adjust.for.con.comp = TRUE)

mod2R0116 <- inla(formula, family = "gaussian", data = data7R,

control.fixed=list(prec.intercept=1),

control.predictor=list(compute=TRUE,link=1),

control.family=list(hyper=list(prec=list(initial=log(1),fixed=TRUE))),

scale=logit.prec ,control.compute=list(dic=TRUE,cpo=TRUE, waic=TRUE))

m <- round(exp(mod2R0116$summary.fixed[,c(1,3,5) ]), digits=2)
